# Supplementary material
Source: publisher figshare collection journal article supplement (https://acs.figshare.com/ndownloader/files/4461601)
Supplement: Supplementary file 1 [file 4461601]

**Grignard Metathesis Chain–Growth Polymerization for Poly(bithienylmethylene)s: Ni Catalyst Can Transfer across the Non-Conjugated Monomer**

Shupeng Wu,<sup>1,3</sup> Yuequan Sun,<sup>2</sup> Li Huang,<sup>1,3</sup> Jianwei Wang,<sup>2</sup> Yihan Zhou,<sup>2</sup>

Yanhou Geng,<sup>\*1</sup> and Fosong Wang<sup>1</sup>

<sup>1</sup>*State Key Laboratory of Polymer Physics and Chemistry, <sup>2</sup>National Analytical Research Center of Electrochemistry and Spectroscopy, Changchun Institute of Applied Chemistry, Chinese Academy of Sciences, Changchun 130022, P. R. China.*

<sup>3</sup>*Graduate School of Chinese Academy of Sciences, Beijing 100049, P.R. China*

E-mail: yhgeng@ciac.jl.cn

|                                                                                     |        |
|-------------------------------------------------------------------------------------|--------|
| General methods and materials.....                                                  | S2     |
| Synthesis and characterizations of monomer.....                                     | S2-8   |
| Synthesis and characterization of homopolymer <b>PBTM</b> .....                     | S9-11  |
| Polymerization with 50% Ni(dppe)Cl <sub>2</sub> and characterizations of dimer..... | S12-13 |
| Synthesis of triblock copolymer <b>P3HT-<i>b</i>-PBTM-<i>b</i>-P3HT</b> .....       | S14-15 |
| References.....                                                                     | S15    |

**General Methods.**  $^1\text{H}$  NMR and  $^{13}\text{C}$  NMR spectra were recorded on Bruker AV 300 spectrometer at 300 MHz and Bruker AV 400 spectrometer at 400 MHz in  $\text{CDCl}_3$  with tetramethylsilane (TMS) as an internal reference, respectively. Gas chromatography (GC) measurements were carried out on a SHIMADZU GC-14C instrument equipped with an OV-1701 column with 1,4-dipentyloxybenzene or 1,4-dioctyloxybenzene as the internal reference. Gel-permeation chromatography (GPC) analysis was conducted on a Waters 2414 system equipped with Waters HT4 and HT3 column-assembly and a Waters 2414 refractive index detector (eluent: tetrahydrofuran (THF), flow rate: 1.00 ml/min, temperature:  $40^\circ\text{C}$ , standard: polystyrene). High Performance Liquid Chromatography (HPLC) measurement was carried out on a Waters 600 controller equipped with two Agilent RX-SIL columns and a Waters 2487 dual  $\lambda$  absorbance detector ( $\lambda$ : 329 nm, eluent: hexane, flow rate: 0.8 mL/min, temperature:  $20^\circ\text{C}$ ). Matrix-assisted laser desorption ionization time-of-flight (MALDI-TOF) mass spectra were recorded on a Kratos AXIMA-CFR Kompact MALDI Mass Spectrometer with terthiophene as the matrix in linear mode.

**Materials.** Tetrahydrofuran (THF) was distilled over sodium-benzophenone. *n*-Butyllithium ( $^n\text{BuLi}$ , 2.5 M solution in hexane, Acros), diisopropylamine (Acros, 99%), 3-nonanone (Alfa Aesar, 98%), Boron trifluoride ethyl etherate ( $\text{BF}_3\cdot\text{Et}_2\text{O}$ , Aldrich), Isopropylmagnesium chloride ( $^i\text{PrMgCl}$ , 2.0 M solution in THF, Aldrich), *t*-butylmagnesium chloride ( $^t\text{BuMgCl}$ , 1.7 M solution in THF, Acros),  $\text{Ni}(\text{dppp})\text{Cl}_2$  (1,3-bis(diphenylphosphino)propane nickel dichloride, Pacific ChemSource, Inc., Zhengzhou, China, 98%),  $\text{Ni}(\text{dppe})\text{Cl}_2$  (1,2-bis (diphenylphosphino)ethane nickel dichloride, Pacific ChemSource Inc., Zhengzhou, China, 98%),  $\text{Ni}(\text{dppf})\text{Cl}_2$  (1,1'- bis(dipenylphosphino)ferrocene nickel dichloride, Pacific ChemSource, Inc., Zhengzhou, China, 98%) and  $\text{Ni}(\text{PPh}_3)_2\text{Cl}_2$  (bis(triphenylphosphine) nickel dichloride, Pacific ChemSource, Inc., Zhengzhou, China, 98%) were used as received without further purification. 1,4-dipentyloxybenzene,<sup>1</sup> 1,4-dioctyloxybenzene<sup>2</sup> and 2,5-dibromo-3-hexylthiophene (**3**)<sup>3</sup> were synthesized according to the references. Their purities are all above 99.5% according to GC measurements.

## Synthesis and characterizations of monomer

**Scheme S1.** The synthesis of monomer.

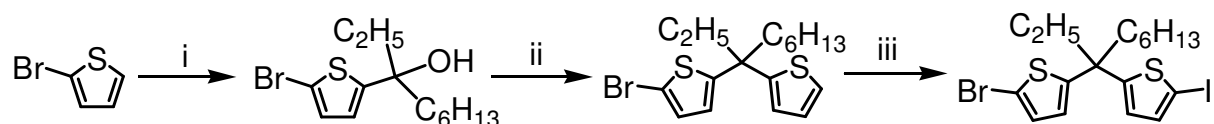

i) 1) LDA, THF, -78 °C to 0 °C; 2) 3-nonanone, 0 °C; ii) thiophene,  $\text{BF}_3 \cdot \text{Et}_2\text{O}$ , room temperature; iii)  $\text{HOAc}/\text{CHCl}_3$ , N-iodosuccinimide, 0 °C to room temperature.

**3-(5-Bromo-2-thienyl)-3-nanol.** Under an argon atmosphere,  $n\text{BuLi}$  (2.5 M in hexane, 43.2 mL, 108 mmol) was added to a stirred solution of diisopropylamine (17.4 mL, 124 mmol) in dry THF (250 mL) at -78 °C. The mixture was warmed to 0 °C, stirred for 5 min, and then cooled to -78 °C. After 2-bromothiophene (10 mL, 103 mmol) was added, the mixture was warmed to 0 °C again and stirred for 30 min. Then 3-nonanone (17.5 mL, 101 mmol) was added via syringe. The mixture was stirred at 0 °C for a further 60 min, and then large amount of water was poured in for extraction with  $\text{Et}_2\text{O}$ . The organic extracts were washed with brine and dried over anhydrous  $\text{MgSO}_4$ . After evaporation of the solvent, the residue was purified by column chromatography on silica gel (petroleum ether (PE)/ $\text{CH}_2\text{Cl}_2$  = 6/1) to give pure product (25.9 g, 84%) as a pale yellow liquid.  $^1\text{H}$  NMR (300 MHz,  $\text{CDCl}_3$ )  $\delta$  = 6.89 (d,  $J$  = 3.9 Hz, 1H), 6.59 (d,  $J$  = 3.9 Hz, 1H), 1.90 (s, 1H), 1.85-1.74 (m, 4H), 1.36-1.13 (m, 8H), 0.86 (t,  $J$  = 7.2 Hz, 6H) ppm;  $^{13}\text{C}$  NMR (100 MHz,  $\text{CDCl}_3$ )  $\delta$  = 153.7, 129.5, 122.8, 110.1, 42.5, 35.5, 31.7, 29.5, 23.4, 22.6, 14.0, 7.8 ppm.

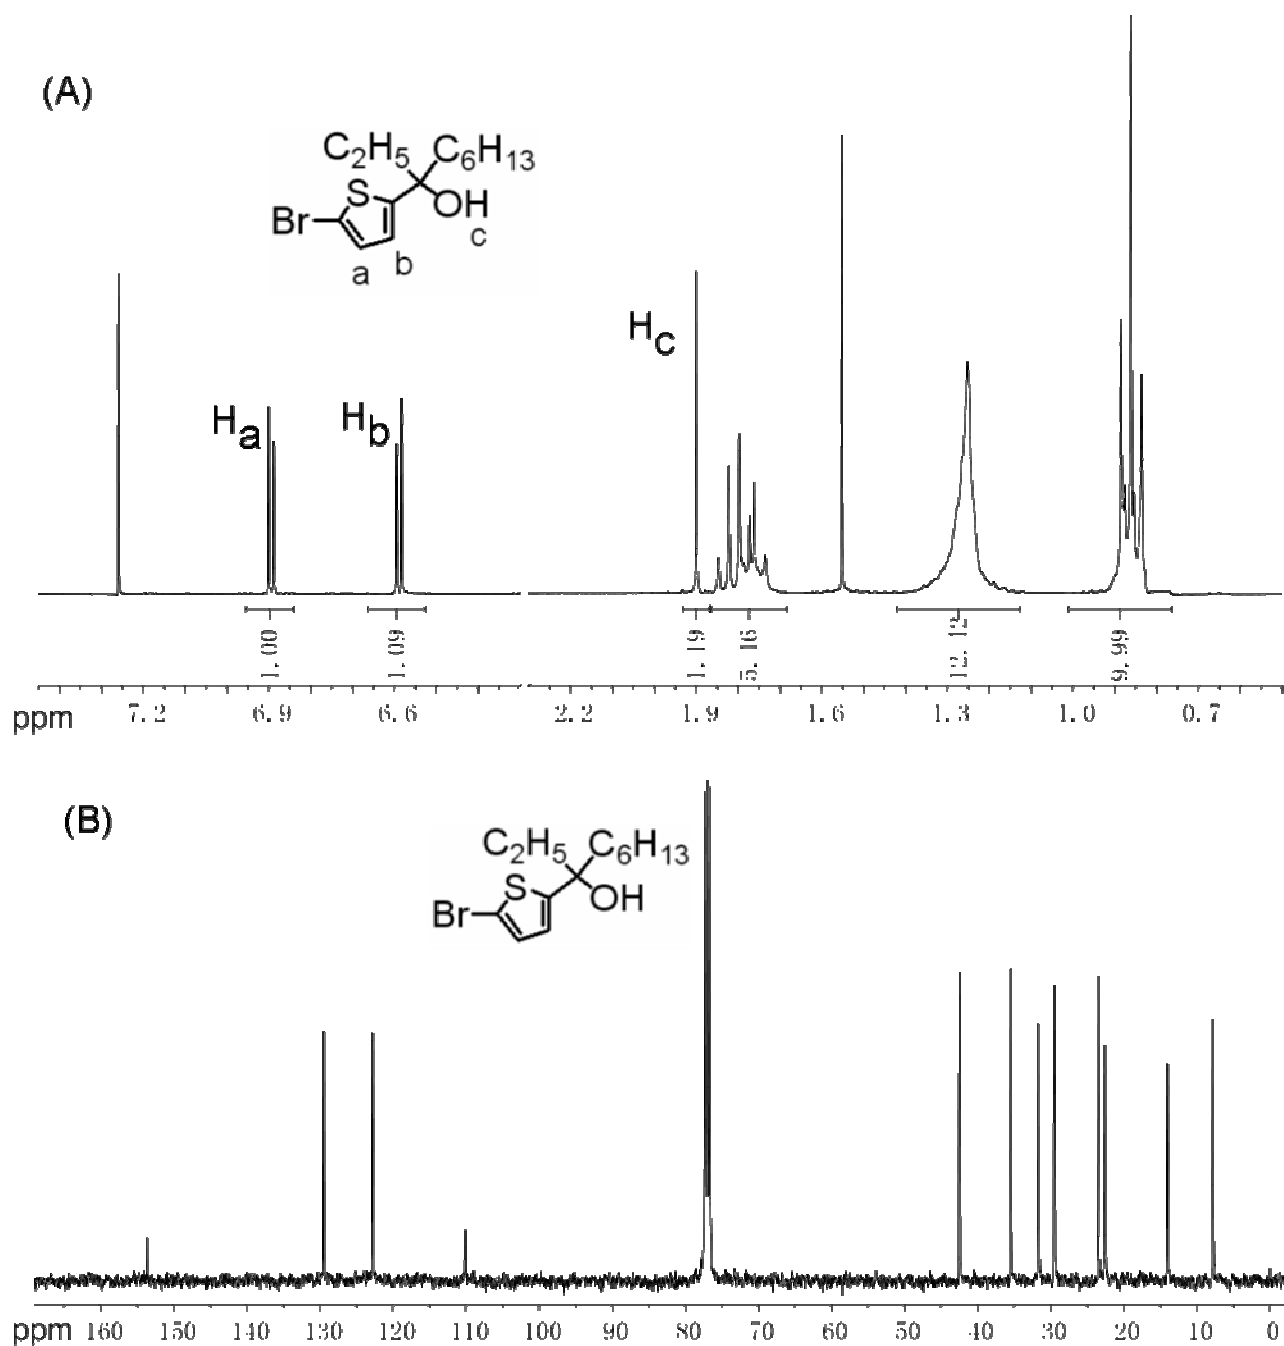

**Figure S1.** (A)  $^1\text{H}$  NMR and (B)  $^{13}\text{C}$  NMR spectra of 3-(5-bromo-2-thienyl)-3-nonanol.

**3-(5-Bromo-2-thienyl)-3-(2-thienyl)nonane.** Under an argon atmosphere,  $\text{BF}_3 \cdot \text{Et}_2\text{O}$  (2.77 mL, 21.9 mmol) was added to a stirred solution of 3-(5-bromo-2-thienyl)-3-nonanol (6.7 g, 21.9 mmol) in thiophene (34.6 mL) via syringe in one portion at room temperature. After stirred for 10 min, a large amount of aqueous  $\text{Na}_2\text{CO}_3$  solution was poured in. The mixture was extracted with PE, and the organic extracts were washed with brine, dried over anhydrous  $\text{MgSO}_4$ . After concentrated under reduced pressure, the residue was purified with column chromatography on silica gel with PE as the eluent to afford pure product (6.5 g, 80%) as a colorless liquid.  $^1\text{H}$  NMR ( $\text{CDCl}_3$ , 300 MHz)  $\delta$  = 7.18 (dd,  $J$  = 5.2, 1.2 Hz, 1H), 6.92 (dd,  $J$  = 5.2, 3.6 Hz, 1H), 6.88 (dd,  $J$  = 3.6, 1.2 Hz, 1H), 6.84 (d,  $J$  = 3.6 Hz, 1H), 6.63 (d,  $J$  = 3.6 Hz, 1H), 2.17-2.00 (m, 4H), 1.29-1.11 (m, 8H), 0.88-0.77 (m, 6H) ppm;  $^{13}\text{C}$  NMR (100 MHz,  $\text{CDCl}_3$ )  $\delta$  = 155.8, 153.1, 128.8, 126.1, 124.1, 124.1, 123.8, 110.3, 47.7, 39.6, 32.9, 31.7, 29.7, 23.8, 22.6, 14.0, 8.5 ppm.

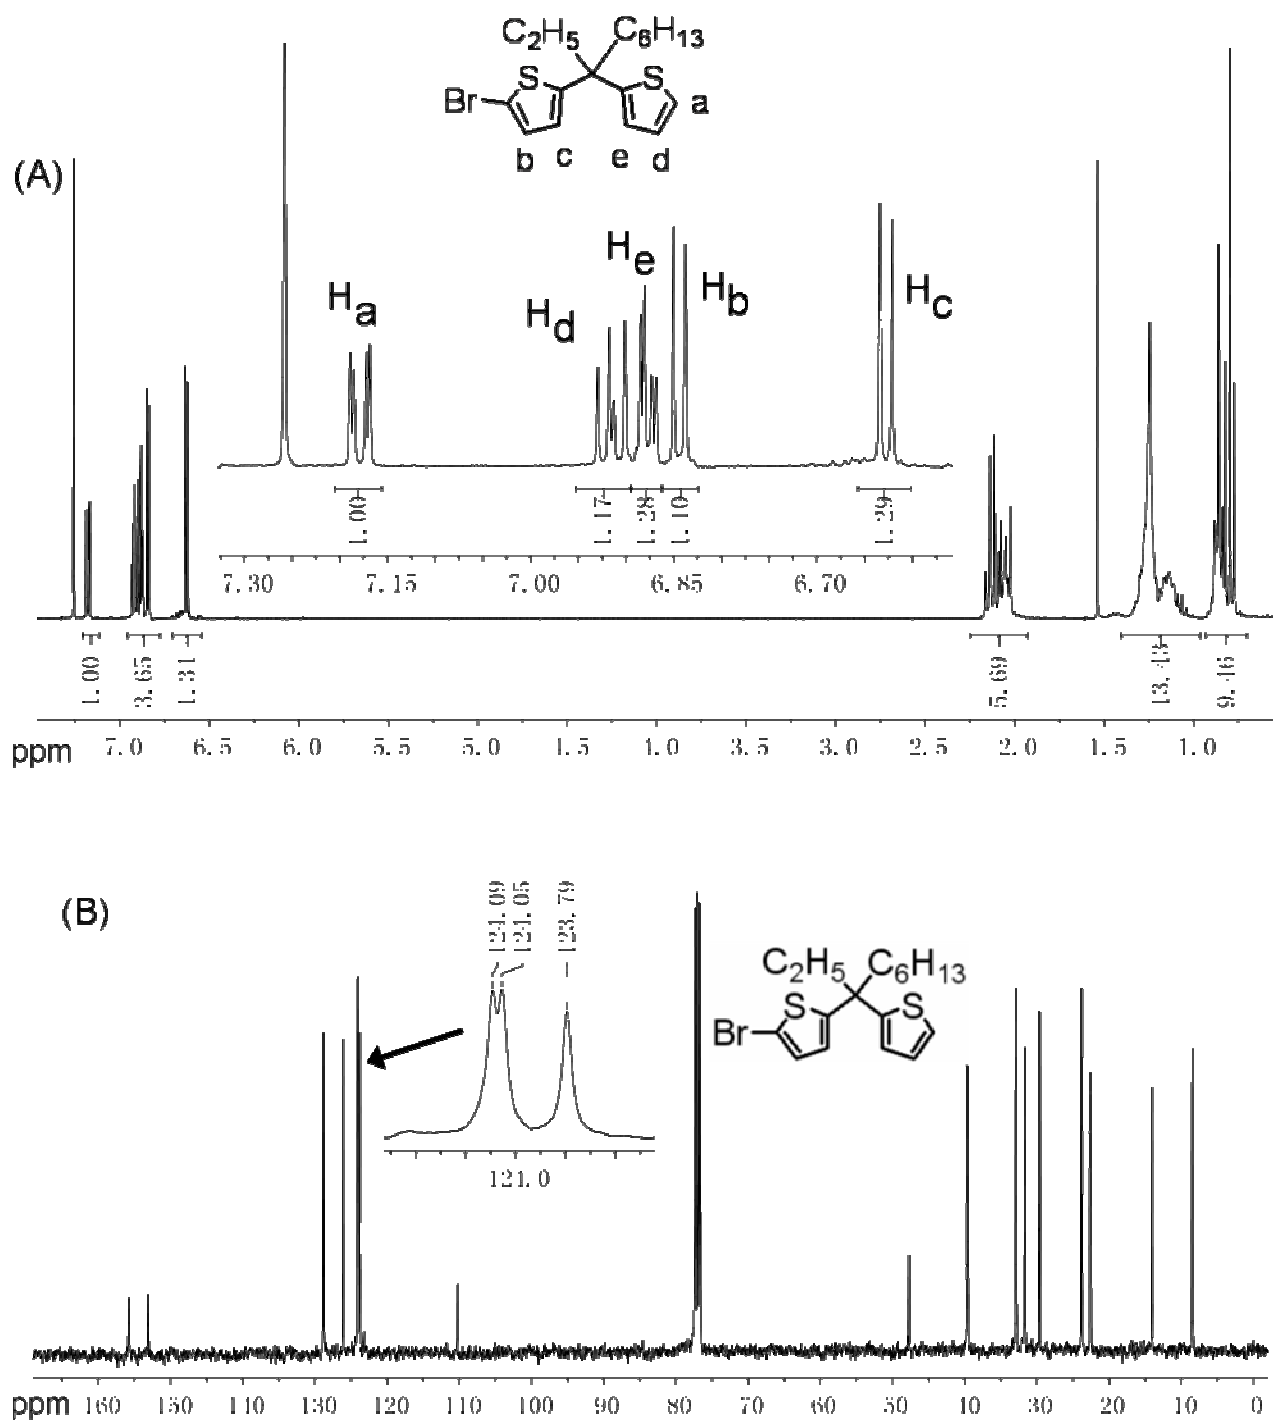

**Figure S2.** (A)  $^1\text{H}$  NMR and (B)  $^{13}\text{C}$  NMR spectra of 3-(5-bromo-2-thienyl)-3-(2-thienyl)nonane.

**3-(5-Bromo-2-thienyl)-3-(5-iodo-2-thienyl)nonane (1).** 3-(5-bromo-2-thienyl)-3- (2-thienyl)nonane (10.28 g, 27.7 mol) was dissolved in acetic acid and  $\text{CHCl}_3$  (125 mL:125mL). N-iodosuccinimide (6.85 g, 30.4 mmol) was added to the solution in several portions at 0°C. The solution was allowed to warm to room temperature and stirred overnight in absence of light. Then a large amount of  $\text{Na}_2\text{CO}_3$  solution was poured in, the mixture was extracted with  $\text{CHCl}_2$ . The organic extracts were washed with  $\text{Na}_2\text{S}_2\text{O}_3$  and brine, dried over anhydrous  $\text{MgSO}_4$ . After concentrated under reduced pressure, the residue was purified with column chromatography on silica gel with PE as the eluent to afford the product (11.2 g, 81%) as a colorless solid. The purity is 99.6% according to GC measurement. mp 49-50 °C;  $^1\text{H}$  NMR ( $\text{CDCl}_3$ , 300 MHz)  $\delta$  = 7.05 (d,  $J$  = 3.6 Hz, 1H), 6.85 (d,  $J$  = 3.6 Hz, 1H), 6.62 (d,  $J$  = 3.6 Hz, 1H), 6.55 (d,  $J$  = 3.6 Hz, 1H), 2.11-1.54 (m, 4H), 1.32-1.08 (m, 8H), 0.88-0.83 (m, 6H) ppm;  $^{13}\text{C}$  NMR (100 MHz,  $\text{CDCl}_3$ )  $\delta$  = 159.2, 154.8, 136.1, 129.0, 125.8, 124.4, 110.6, 71.7, 48.2, 39.5, 32.7, 31.6, 29.6, 23.7, 22.6, 14.0, 8.4 ppm.

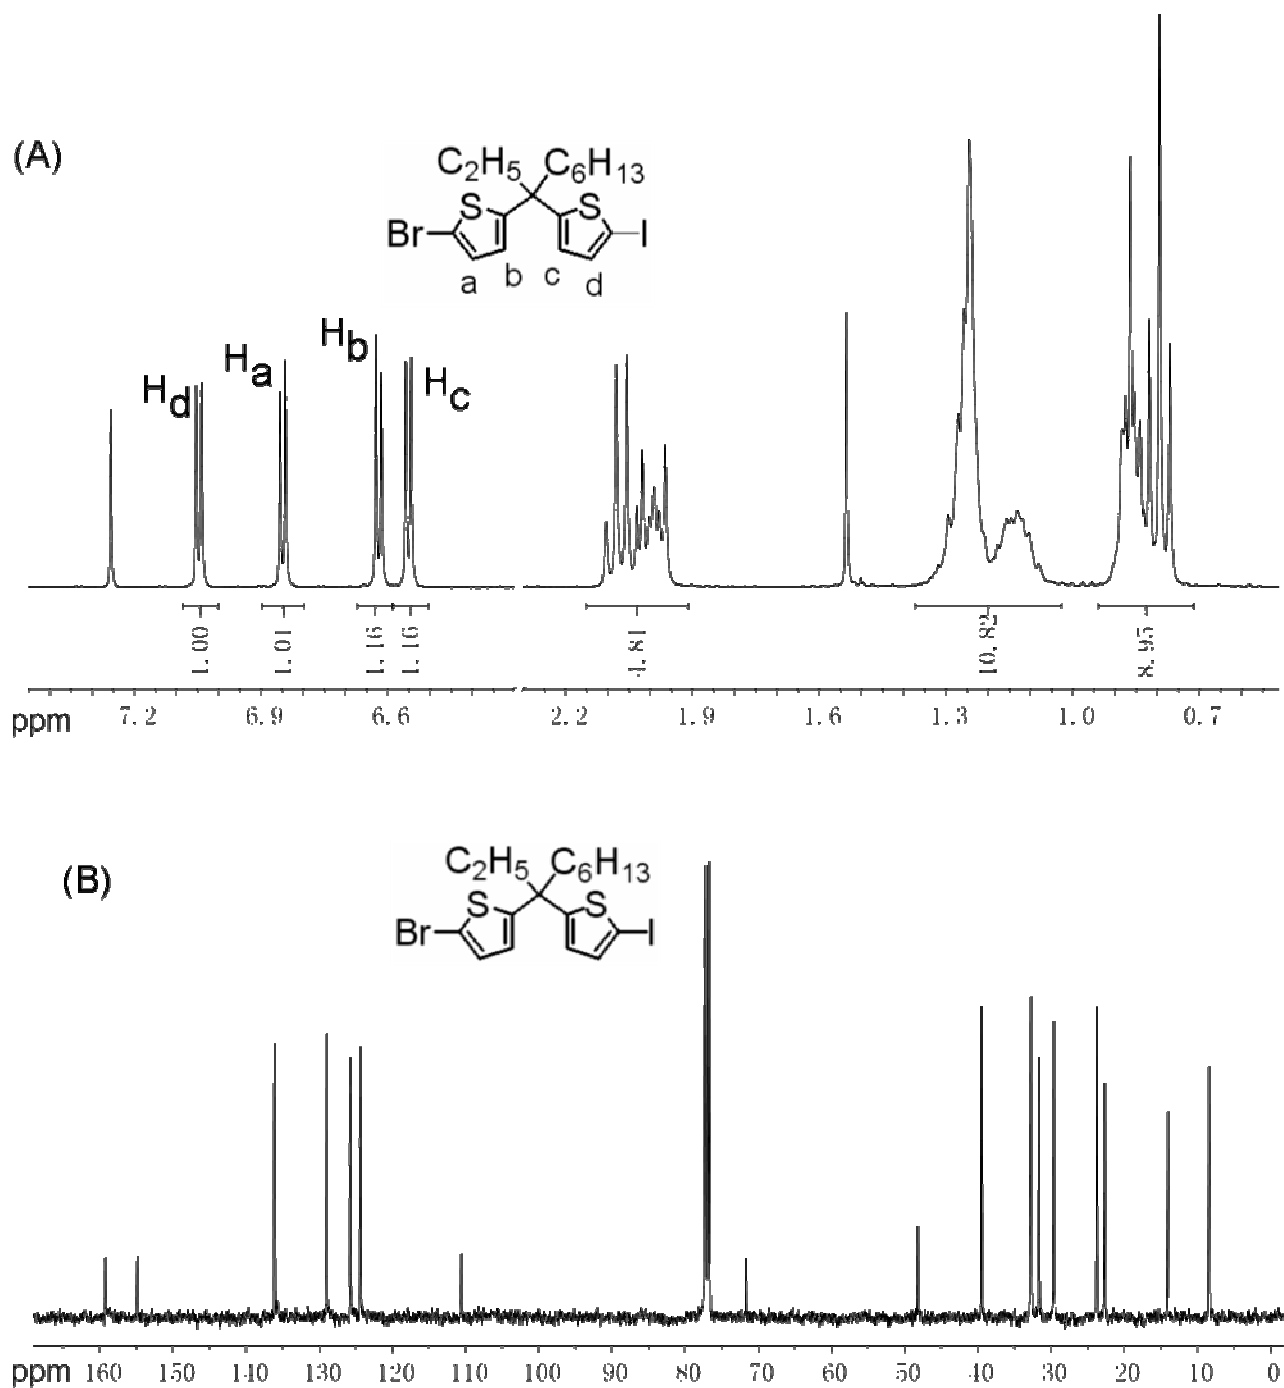

**Figure S3.** (A)  $^1\text{H}$  NMR and (B)  $^{13}\text{C}$  NMR spectra of 3-(5-bromo-2-thienyl)-3-(5-iodo-2-thienyl)nonane.



## Synthesis and characterization of homopolymer PBTM

**General procedure for the Synthesis of poly(2,5-thienylene-1-ethyl-1-hexylmethylen-2,5-thienylene) (PBTM).** In an thoroughly dried Schlenk tube,  $i\text{PrMgCl}$  (0.49 mL, 0.98 mmol) was added into a mixture of **1** (497 mg, 1.00 mmol), 1,4-dioctyloxybenzene (internal standard for GC analysis, 72 mg, 0.25 mmol) and dry THF (5 mL), after stirring at  $-20\text{ }^{\circ}\text{C}$  for 1 h, 0.2 mL solution was withdrawn for GC analysis (conversion of **1** was 98%). At  $0\text{ }^{\circ}\text{C}$ , a suspension of  $\text{Ni(dppe)Cl}_2$  (10.6 mg, 0.02 mmol) in dry THF (3 mL) was added. After 70 min (91% of Grignard reagent **2** was consumed), the polymerization was quenched by addition of 5 M HCl aqueous solution. The mixture was extracted with  $\text{CHCl}_3$ , and the organic extracts were washed with brine, dried over anhydrous  $\text{MgSO}_4$ . After concentrated under reduced pressure, the solution was dropped into methanol for precipitation. The solid was filtered and dried to give **PBTM** ( $M_n = 1.4 \times 10^4$ , PDI = 1.3) as a white solid (226 mg, 80%).  $^1\text{H}$  NMR (300 MHz,  $\text{CDCl}_3$ )  $\delta$  = 6.88 (d,  $J = 3.9$  Hz, Th-*H*), 6.73 (d,  $J = 3.9$  Hz, Th-*H*), 2.13-2.02 (m, Th-C( $\text{CH}_2\text{CH}_3$ )( $\text{CH}_2\text{C}_4\text{H}_8\text{CH}_3$ )), 1.38-1.05 (m, Th-C( $\text{CH}_2\text{CH}_3$ )( $\text{CH}_2\text{C}_4\text{H}_8\text{CH}_3$ )), 0.88-0.78 (m, Th-C( $\text{CH}_2\text{CH}_3$ )( $\text{CH}_2\text{C}_4\text{H}_8\text{CH}_3$ )).

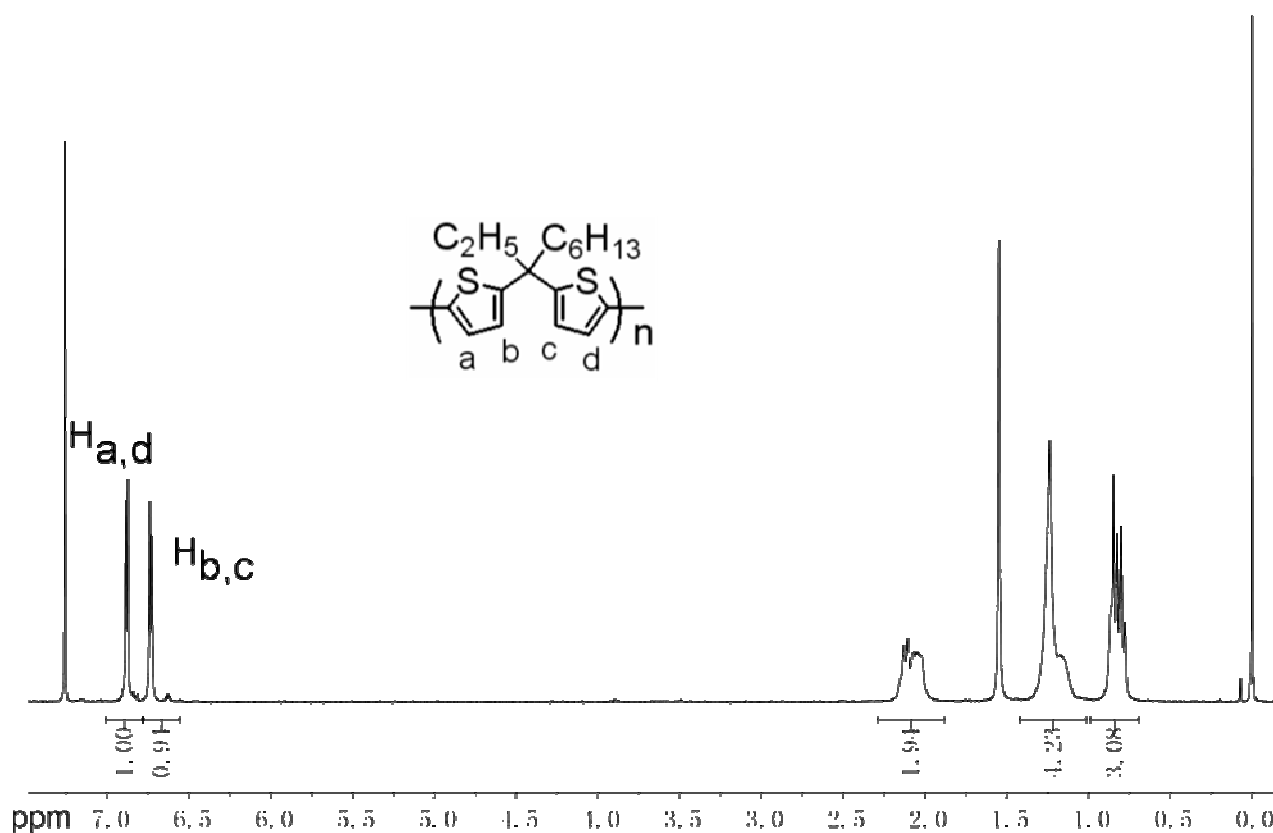

**Figure S4.**  $^1\text{H}$  NMR spectrum of **PBTM** ( $M_n = 1.4 \times 10^4$ , PDI = 1.28).

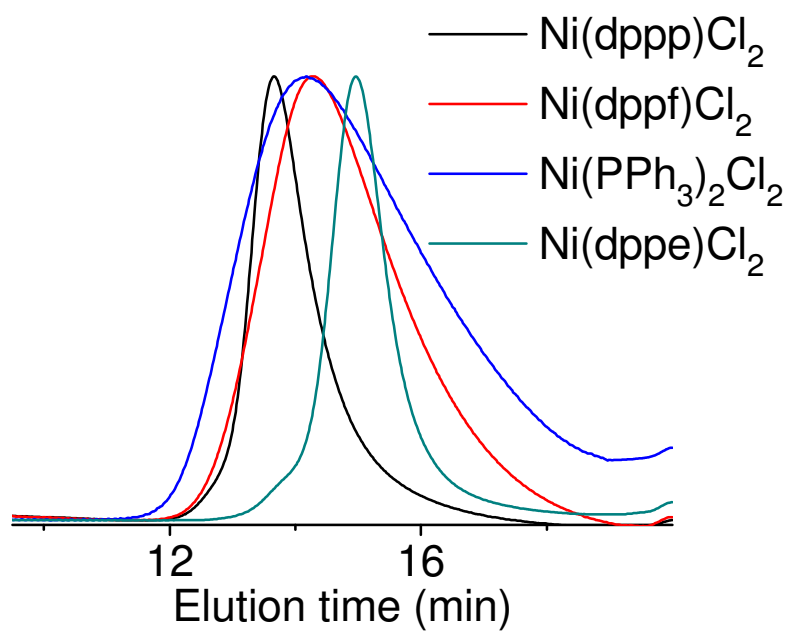

**Figure S5.** GPC profiles of **PBTM** synthesized with various catalysts. All polymerizations were carried out at 0 °C with 2% Ni catalysts.

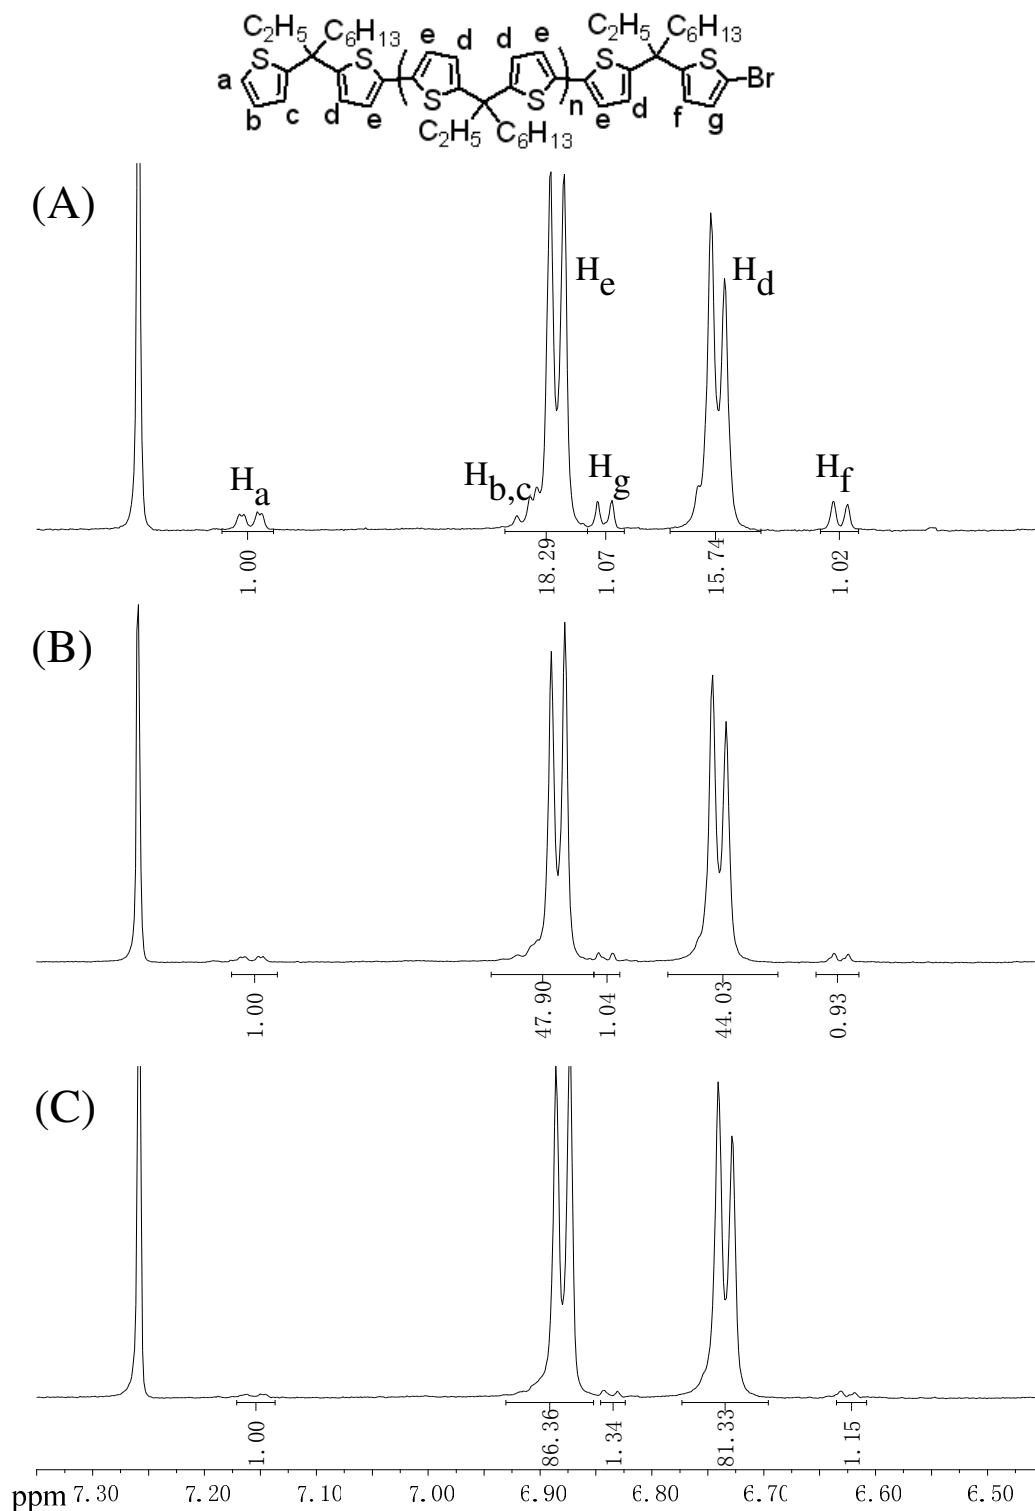

**Figure S6.**  $^1\text{H}$  NMR spectrum of (A) **PBTM** ( $M_n = 3.0 \times 10^3$ , PDI = 1.12) catalyzed by 10% Ni(dppe)Cl<sub>2</sub>, (B) **PBTM** ( $M_n = 8.7 \times 10^3$ , PDI = 1.09) catalyzed by 4% Ni(dppe)Cl<sub>2</sub>, (C) **PBTM** ( $M_n = 1.3 \times 10^4$ , PDI = 1.28) catalyzed by 2% Ni(dppe)Cl<sub>2</sub>. The assignment is determined according to the  $^1\text{H}$  NMR spectrum of dimer. The integral ratio of H end (H<sub>a</sub>) to Br end (H<sub>g</sub> or H<sub>f</sub>) is about 1:1 for the polymers with all the three different  $M_n$ s, consistent with the dominant H/Br end groups.

**Polymerization with 50% Ni(dppe)Cl<sub>2</sub> and characterizations of dimer.** In an thoroughly dried Schlenk tube, <sup>i</sup>PrMgCl (0.15 mL, 0.29 mmol) was added into a mixture of **1** (149 mg, 0.30 mmol), 1,4-dioctyloxybenzene (internal standard for GC analysis, 20 mg, 0.60 mmol) and dry THF (2.4 mL), after stirring at -20 °C for 1 h, 0.1 mL solution was withdrawn for GC analysis (conversion of **1** was 96%). At 0 °C, a suspension of Ni(dppe)Cl<sub>2</sub> (79 mg, 0.15 mmol) in dry THF (3.0 mL) was added. After 10 min (96% of **2** was consumed), the polymerization was quenched by addition of 5 M HCl aqueous solution. The mixture was extracted with CHCl<sub>3</sub>, and the organic extracts were washed with brine, dried over anhydrous MgSO<sub>4</sub>. After concentrated under reduced pressure, separation by column chromatography on silica gel (PE/CH<sub>2</sub>Cl<sub>2</sub> = 30/1) afforded dimer of 46 mg and higher oligomers of 49 mg both as colorless liquids. The purity of dimer is 99.9% according to HPLC measurement. <sup>1</sup>H NMR (CDCl<sub>3</sub>, 300 MHz) δ = 7.17 (dd, *J* = 5.2, 1.2 Hz, 1H), 6.93-6.88 (m, 4H), 6.85 (d, *J* = 3.9 Hz, 1H), 6.74 (t, *J* = 3.9 Hz, 2H), 6.63 (d, *J* = 3.9 Hz, 1H), 2.17-1.99 (m, 8H), 1.29-1.11 (m, 16H), 0.88-0.78 (m, 12H) ppm.

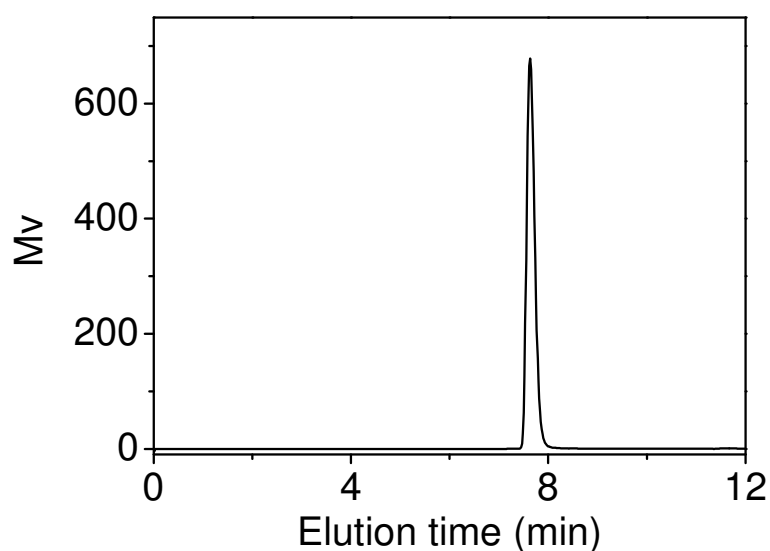

**Figure S7.** HPLC profile of dimer, the one-peak shape curve verifies a unique structure.

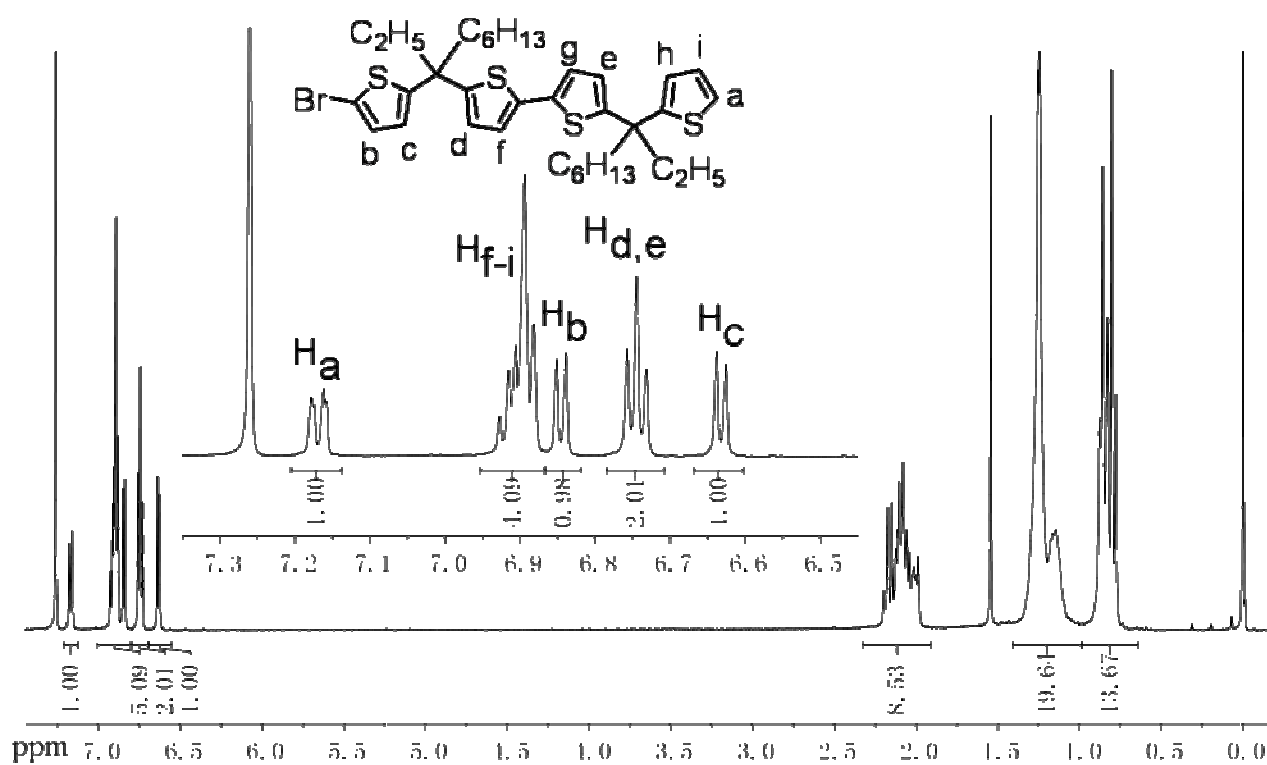

**Figure S8.**  $^1\text{H}$  NMR spectrum of dimer.

**Synthesis of P3HT-*b*-PBTM-*b*-P3HT.** Since triblock copolymerizations in both routes were conducted in a similar manner, here only one example was depicted as follows. Three Schlenk tubes were thoroughly dried prior to use. In one tube, a mixture of **1** (249 mg, 0.50 mmol), <sup>i</sup>PrMgCl (0.25 mL, 0.49 mmol) and 1,4-dioctyloxybenzene (internal standard for GC analysis, 40 mg, 0.12 mmol) in dry THF (4.0 mL) was stirred at -20 °C for 1 h (solution A, 99% of **1** was converted). In the other tube, a mixture of **3** (659 mg, 1.80 mmol), <sup>t</sup>BuMgCl (1.06 mL, 1.80 mmol) and 1,4-dipentyloxybenzene (internal standard for GC analysis, 120 mg, 0.48 mmol) in THF (15 mL) was stirred at 25 °C for 24 h (solution B, 80% of **3** was converted). According to GC analysis, conversions of **1** and **3** were 99% and 80%, respectively. For triblock copolymerization, 7.5 mL of solution B was added into the third Schlenk tube at room temperature, then a suspension of Ni(dppe)Cl<sub>2</sub> (10.6 mg, 0.02 mmol) in dry THF (3 mL) was added. After stirred for 60 min, 0.5 mL of the solution was withdrawn for GC and GPC analysis (78% of **4** was consumed, *M<sub>n</sub>* and PDI of homopolymer **P3HT** are 5.0 × 10<sup>3</sup> and 1.3, respectively). The homopolymer solution was cooled to 0 °C and the solution A was added via syringe. After 100 min, 1 mL of the solution was withdrawn for GC and GPC analysis (96% of **2** was consumed, *M<sub>n</sub>* and PDI of the diblock copolymer are 1.1 × 10<sup>4</sup> and 1.4, respectively). Finally, the left solution B was added via syringe and the reaction mixture was allowed to warm to room temperature again. After reacting for 120 min (90% of **4** was consumed), the polymerization was quenched by addition of adequate 5 M HCl solution. The mixture was extracted with CH<sub>2</sub>Cl<sub>2</sub>, and the organic layer was washed with brine, dried over anhydrous MgSO<sub>4</sub>. After concentrated under reduced pressure, the solution was dropped into methanol for precipitation. The solid was filtered and the residual methanol was removed under reduced pressure to give the product (*M<sub>n</sub>* = 1.6 × 10<sup>4</sup>, PDI = 1.4) as a dark purple solid (222 mg, 54%). <sup>1</sup>H NMR (300 MHz, CDCl<sub>3</sub>) δ = 6.98 (s, Th-*H* of **P3HT**), 6.88 (d, *J* = 3.9 Hz, Th-*H* of **PBTM**), 6.73 (d, *J* = 3.9 Hz, Th-*H* of **PBTM**), 2.83-2.59 (m, Th-CH<sub>2</sub>C<sub>5</sub>H<sub>11</sub> of **P3HT**), 2.13-2.02 (m, Th-C(CH<sub>2</sub>CH<sub>3</sub>)CH<sub>2</sub>C<sub>4</sub>H<sub>8</sub>CH<sub>3</sub> of **PBTM**), 1.73-1.66 (m, Th-CH<sub>2</sub>CH<sub>2</sub>C<sub>4</sub>H<sub>9</sub> of **P3HT**), 1.38-1.05 (m, Th-C(CH<sub>2</sub>CH<sub>3</sub>)CH<sub>2</sub>C<sub>4</sub>H<sub>8</sub>CH<sub>3</sub> of **PBTM**), 0.88-0.78 (m, Th-C<sub>5</sub>H<sub>10</sub>CH<sub>3</sub> of **P3HT** + Th-C(CH<sub>2</sub>CH<sub>3</sub>)CH<sub>2</sub>C<sub>4</sub>H<sub>8</sub>CH<sub>3</sub> of **PBTM**).

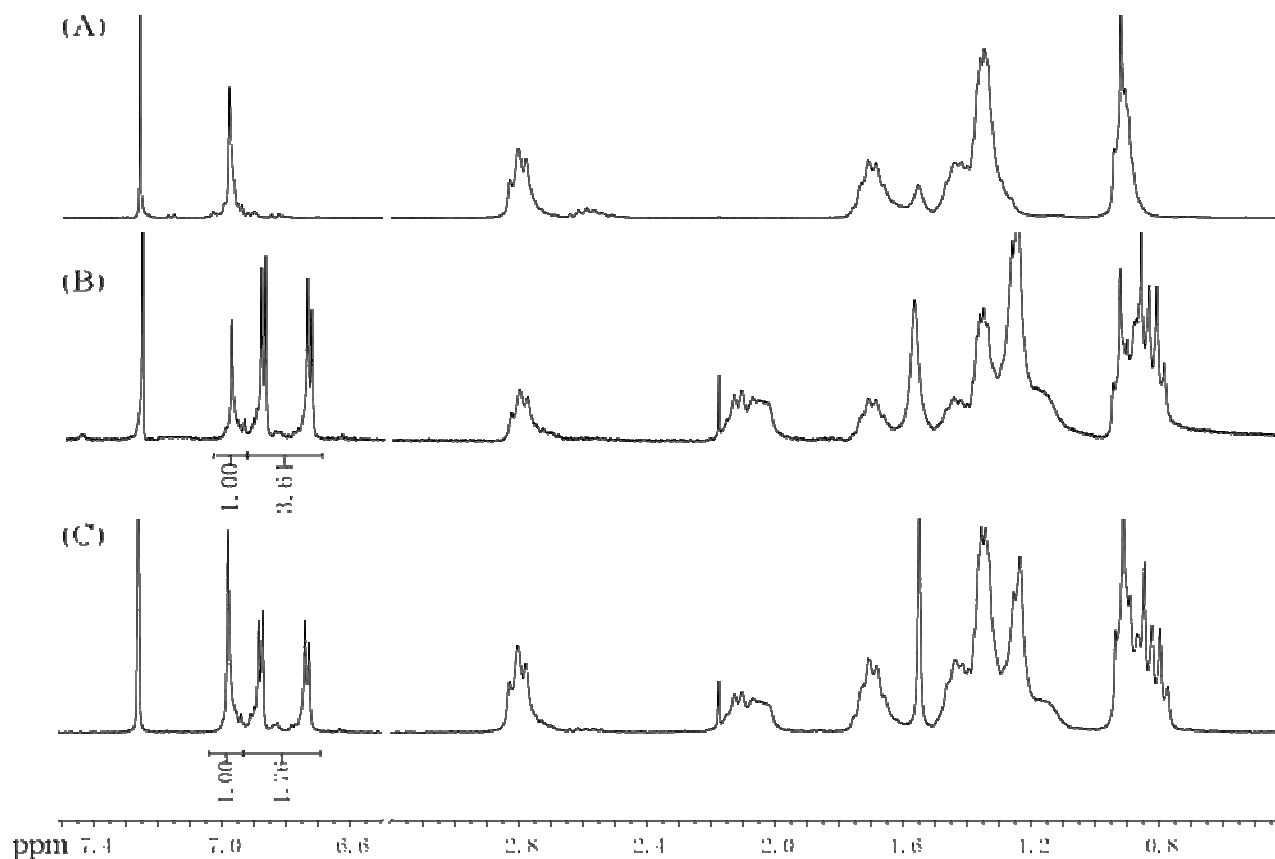

**Figure S9.**  $^1\text{H}$  NMR spectra of (A) **P3HT**, (B) **P3HT-*b*-PBTM** and (C) **P3HT-*b*-PBTM-*b*-P3HT** obtained by triblock copolymerization with monomer addition order of **4**, **2** and then **4**. The signals at 7.01-6.93 ppm and 6.93-6.70 ppm are assigned to the protons in thiophene rings of **P3HT** and **PBTM**, respectively. The actual ratios of the polymerization degrees between **P3HT** and **PBTM** blocks in diblock and triblock copolymers can be calculated based-on the integral ratios of these two signals. The values (52:48 and 69:31) are very close to the ones calculated based-on the ratios of converted monomers/catalyst (51:49 and 72:28).

## References

- (1) Lüttringhaus, A. *Liebigs Ann. Chem.* **1937**, 528, 181
- (2) Jammi, S.; Rout, L.; Punniyamurthy, T. *Tetrahedron: Asymmetry* **2007**, 18, 2016
- (3) Iovu, M. C.; Sheina, E. E.; Gil, R. R.; McCullough, R. D. *Macromolecules* **2005**, 38, 8649
